# Supplementary material for: Clinical Significance, Species Distribution, and Temporal Trends of Nontuberculous Mycobacteria, Denmark, 1991–2022
Source: PubMed Central journal article supplement (PMC11346989; doi:10.3201/eid3009.240095), 2024-09
Supplement: 24-0095-Techapp-s1.pdf [file 24-0095-Techapp-s1.pdf]

EID cannot ensure accessibility for supplementary materials supplied by authors. Readers who have difficulty accessing supplementary content should contact the authors for assistance.

# Clinical Significance, Species Distribution, and Temporal Trends of Nontuberculous Mycobacteria, Denmark, 1991–2022

## Appendix

**Appendix Table 1.** Species distribution of nontuberculous mycobacteria by disease categories\* in Denmark from 1991–2022.

| Species**                               | Definite disease, n (%) | Possible disease, n (%) | Isolation, n (%) |
|-----------------------------------------|-------------------------|-------------------------|------------------|
| <i>M. avium</i> complex                 | 1,478 (58)              | 692 (27)                | 377 (15)         |
| <i>M. avium</i>                         | 1,296 (63)              | 482 (24)                | 268 (13)         |
| <i>M. intracellulare</i>                | 130 (39)                | 137 (41)                | 67 (20)          |
| <i>M. chimaera</i>                      | 38 (32)                 | 52 (44)                 | 29 (24)          |
| Other/unspecified                       | 14 (29)                 | 21 (44)                 | 13 (27)          |
| <i>M. abscessus-chelonae</i> complex    | 132 (48)                | 46 (17)                 | 97 (35)          |
| <i>M. xenopi</i> group                  | 86 (37)                 | 72 (31)                 | 73 (32)          |
| <i>M. fortuitum-smegmatis</i> group     | 31 (15)                 | 54 (27)                 | 117 (58)         |
| <i>M. malmoense</i>                     | 114 (68)                | 31 (18)                 | 23 (14)          |
| <i>M. marinum</i>                       | 128 (100)               | 0                       | 0                |
| <i>M. celatum</i> group                 | 47 (40)                 | 42 (36)                 | 28 (24)          |
| <i>M. kansasii</i>                      | 45 (56)                 | 27 (33)                 | 9 (11)           |
| <i>M. simiae</i> complex                | 19 (44)                 | 12 (28)                 | 12 (28)          |
| <i>M. parascrofulaceum/scrofulaceum</i> | 8 (20)                  | 7 (18)                  | 25 (62)          |
| <i>M. szulgai</i>                       | 15 (38)                 | 16 (41)                 | 8 (21)           |
| <i>M. interjectum</i>                   | 6 (27)                  | 4 (18)                  | 12 (55)          |
| <i>M. terrae</i> group                  | 3 (17)                  | 4 (22)                  | 11 (61)          |
| <i>M. phocaicum/mucogenicum</i>         | 2 (12)                  | 2 (12)                  | 13 (76)          |
| Other***                                | 44 (23)                 | 51 (26)                 | 100 (51)         |
| Total, n = 4123 (%)                     | 2158 (52)               | 1060 (26)               | 905 (22)         |

\*See methods for criteria.

\*\*Species were grouped using phylogenetic classifications described by Tortoli et al. (1).

\*\*\*Defined as *Mycobacteria* spp. and species with n < 15 throughout the study period.

**Appendix Table 2.** Species distribution of nontuberculous mycobacteria by disease localization in Denmark from 1991–2022.

| Species*                                | Pulmonary, n (%) | Extra-pulmonary, n (%) | Disseminated, n (%)** |
|-----------------------------------------|------------------|------------------------|-----------------------|
| <i>M. avium</i> complex                 | 1,640 (58)       | 763 (69)               | 144 (87)              |
| <i>M. avium</i>                         | 1,172 (57)       | 735 (36)               | 139 (6.8)             |
| <i>M. intracellulare</i>                | 315 (94)         | 17 (5.1)               | 2 (0.6)               |
| <i>M. chimaera</i>                      | 115 (97)         | 2 (1.7)                | 2 (1.7)               |
| Other/unspecified                       | 38 (79)          | 9 (19)                 | 1 (2.1)               |
| <i>M. abscessus-chelonae</i> complex    | 215 (78)         | 54 (20)                | 6 (2.2)               |
| <i>M. xenopi</i> group                  | 221 (96)         | 6 (2.6)                | 4 (1.7)               |
| <i>M. fortuitum-smegmatis</i> group     | 179 (89)         | 22 (11)                | 1 (0.5)               |
| <i>M. malmoense</i>                     | 121 (72)         | 46 (27)                | 1 (0.6)               |
| <i>M. marinum</i>                       | 0                | 128 (100)              | 0                     |
| <i>M. celatum</i> group                 | 103 (88)         | 13 (11)                | 1 (0.9)               |
| <i>M. kansasii</i>                      | 66 (81)          | 10 (12)                | 5 (6.2)               |
| <i>M. simiae</i> complex                | 33 (77)          | 8 (19)                 | 2 (4.7)               |
| <i>M. parascrofulaceum/scrofulaceum</i> | 35 (88)          | 4 (10)                 | 1 (2.5)               |
| <i>M. szulgai</i>                       | 37 (95)          | 2 (5.1)                | 0                     |
| <i>M. interjectum</i>                   | 18 (82)          | 4 (18)                 | 0                     |
| <i>M. terrae</i> group                  | 15 (83)          | 3 (17)                 | 0                     |
| <i>M. phocaicum/mucogenicum</i>         | 15 (88)          | 2 (12)                 | 0                     |
| Other***                                | 153 (78)         | 41 (21)                | 1 (0.5)               |
| Total, n = 4123 (%)                     | 2851 (69)        | 1106 (27)              | 166 (4)               |

\*Species were grouped using phylogenetic classifications described by Tortoli et al. (1).

\*\*Patients with samples from both pulmonary and extra-pulmonary locations were categorized as disseminated disease.

\*\*\*Defined as *Mycobacteria* spp. and species with n < 15 throughout the study period.

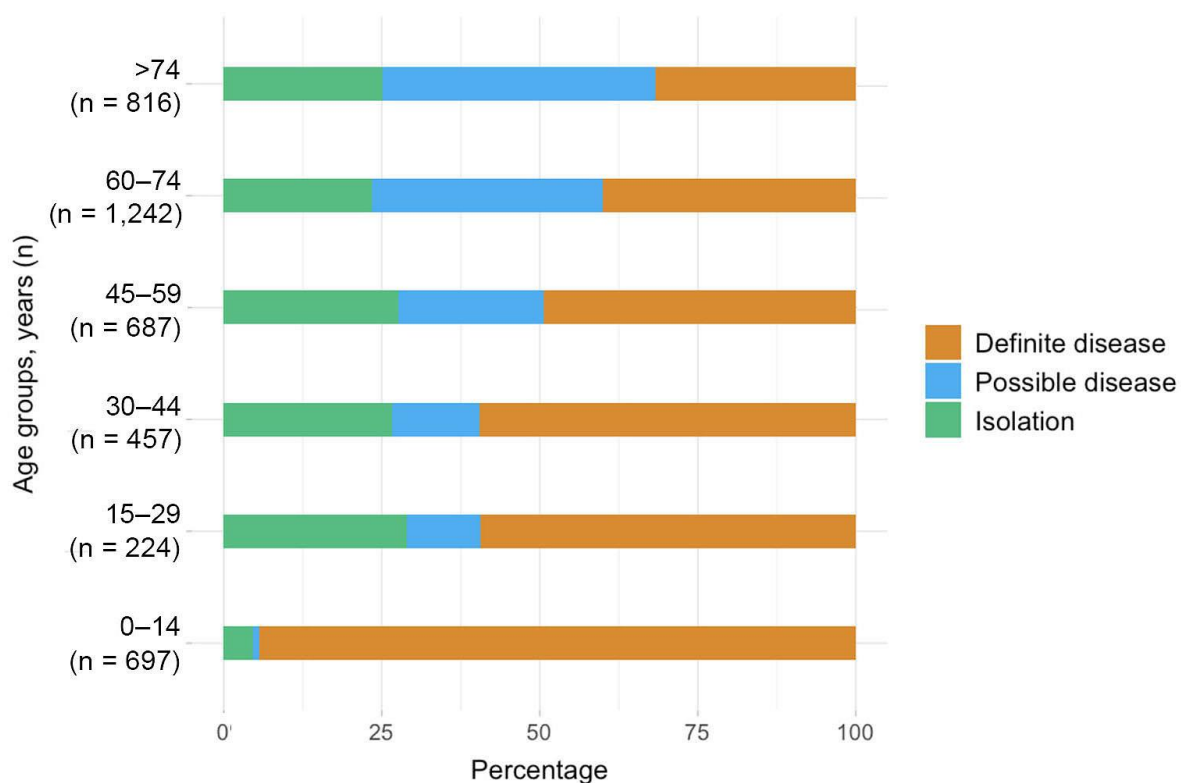

**Appendix Figure 1.** Clinical significance of nontuberculous mycobacteria by age groups in Denmark from 1991–2022. See methods for criteria.

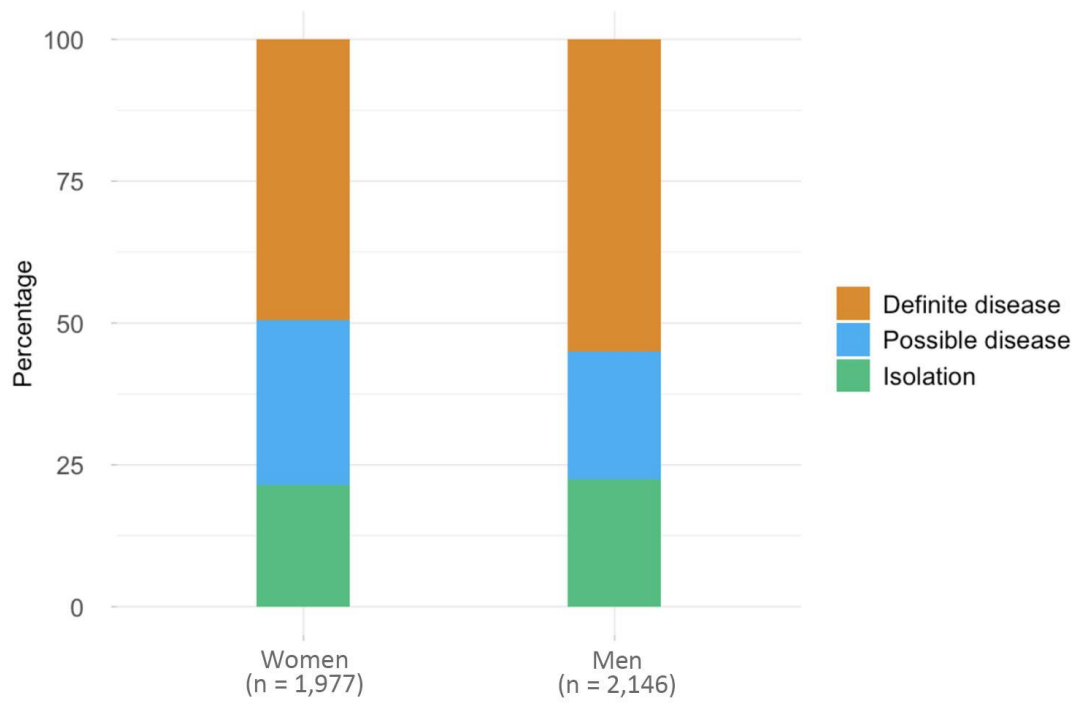

**Appendix Figure 2.** Clinical significance of nontuberculous mycobacteria by sex in Denmark from 1991–2022. See methods for criteria.

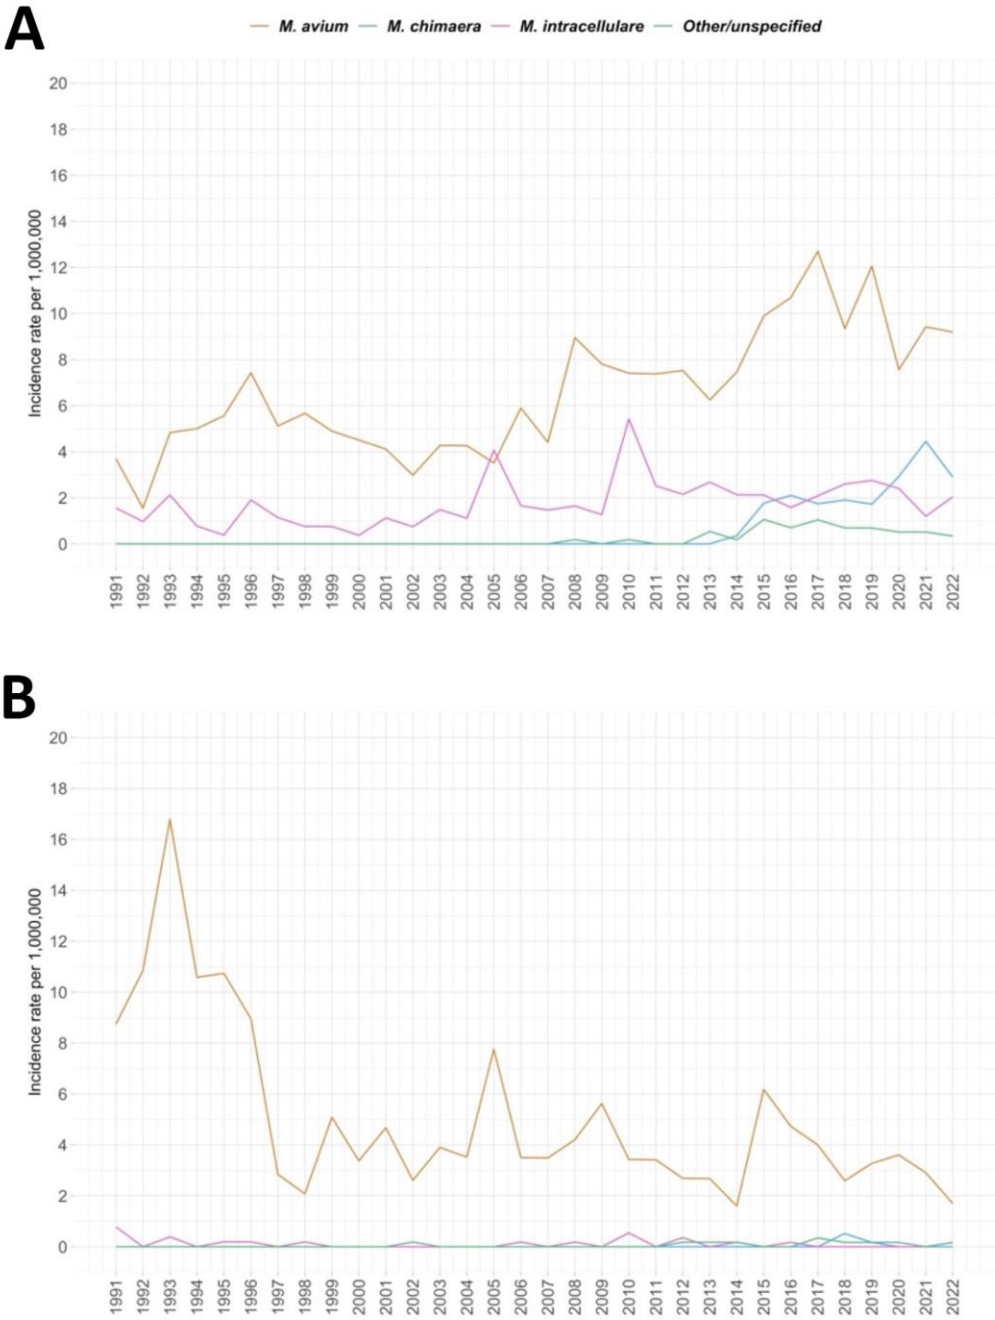

**Appendix Figure 3.** Annual incidence rates (infections/1,000,000 persons) of unique patients with a first culture positive for *M. avium* complex Denmark from 1991–2022 by subspecies for patients with pulmonary (Panel A) and extrapulmonary and disseminated nontuberculous mycobacteria (Panel B). Patients with samples from both pulmonary and extrapulmonary locations were categorized as disseminated disease. Species were grouped using phylogenetic classifications described by Tortoli et al. (1).

## Reference

1. Tortoli E, Fedrizzi T, Meehan CJ, Trovato A, Grottola A, Giacobazzi E, et al. The new phylogeny of the genus *Mycobacterium*: the old and the news. *Infect Genet Evol.* 2017;56:19–25. [PubMed](#)  
<https://doi.org/10.1016/j.meegid.2017.10.013>
